# Supplementary material for: Theoretical study on the mechanism of Ag-catalyzed synthesis of 3-alkylideneoxindoles from N-aryl-α-diazoamides: a Lewis acid or Ag-carbene pathway?
Source: Royal Society of Chemistry journal article supplement (doi:10.1039/c2ob25581b), 2012-01-01
Supplement: c2ob25581b.pdf [file c2ob25581b.pdf]

## Supporting Information

### Theoretical Study on Mechanism of Ag-catalyzed Synthesis of 3-Alkylideneoxindoles from *N*-Aryl- $\alpha$ -diazoamides: a Lewis Acid or Ag-carbene Pathway?

Zhe Li,\* Hai-Xiang Gao

*Department of Applied Chemistry, China Agricultural University, Beijing 100193, China*

Email address: [lizhe@cau.edu.cn](mailto:lizhe@cau.edu.cn)

#### Contents:

1. Structural Parameters of Key Intermediates and Transition States.....S2
2. Charge Distribution of Key Atoms along the Reaction Coordinate.....S3
3. Computational Methodologies.....S4
4. Energies of Intermediates and Transition States.....S4
5. Cartesian Coordinates of Intermediates and Transition States.....S6

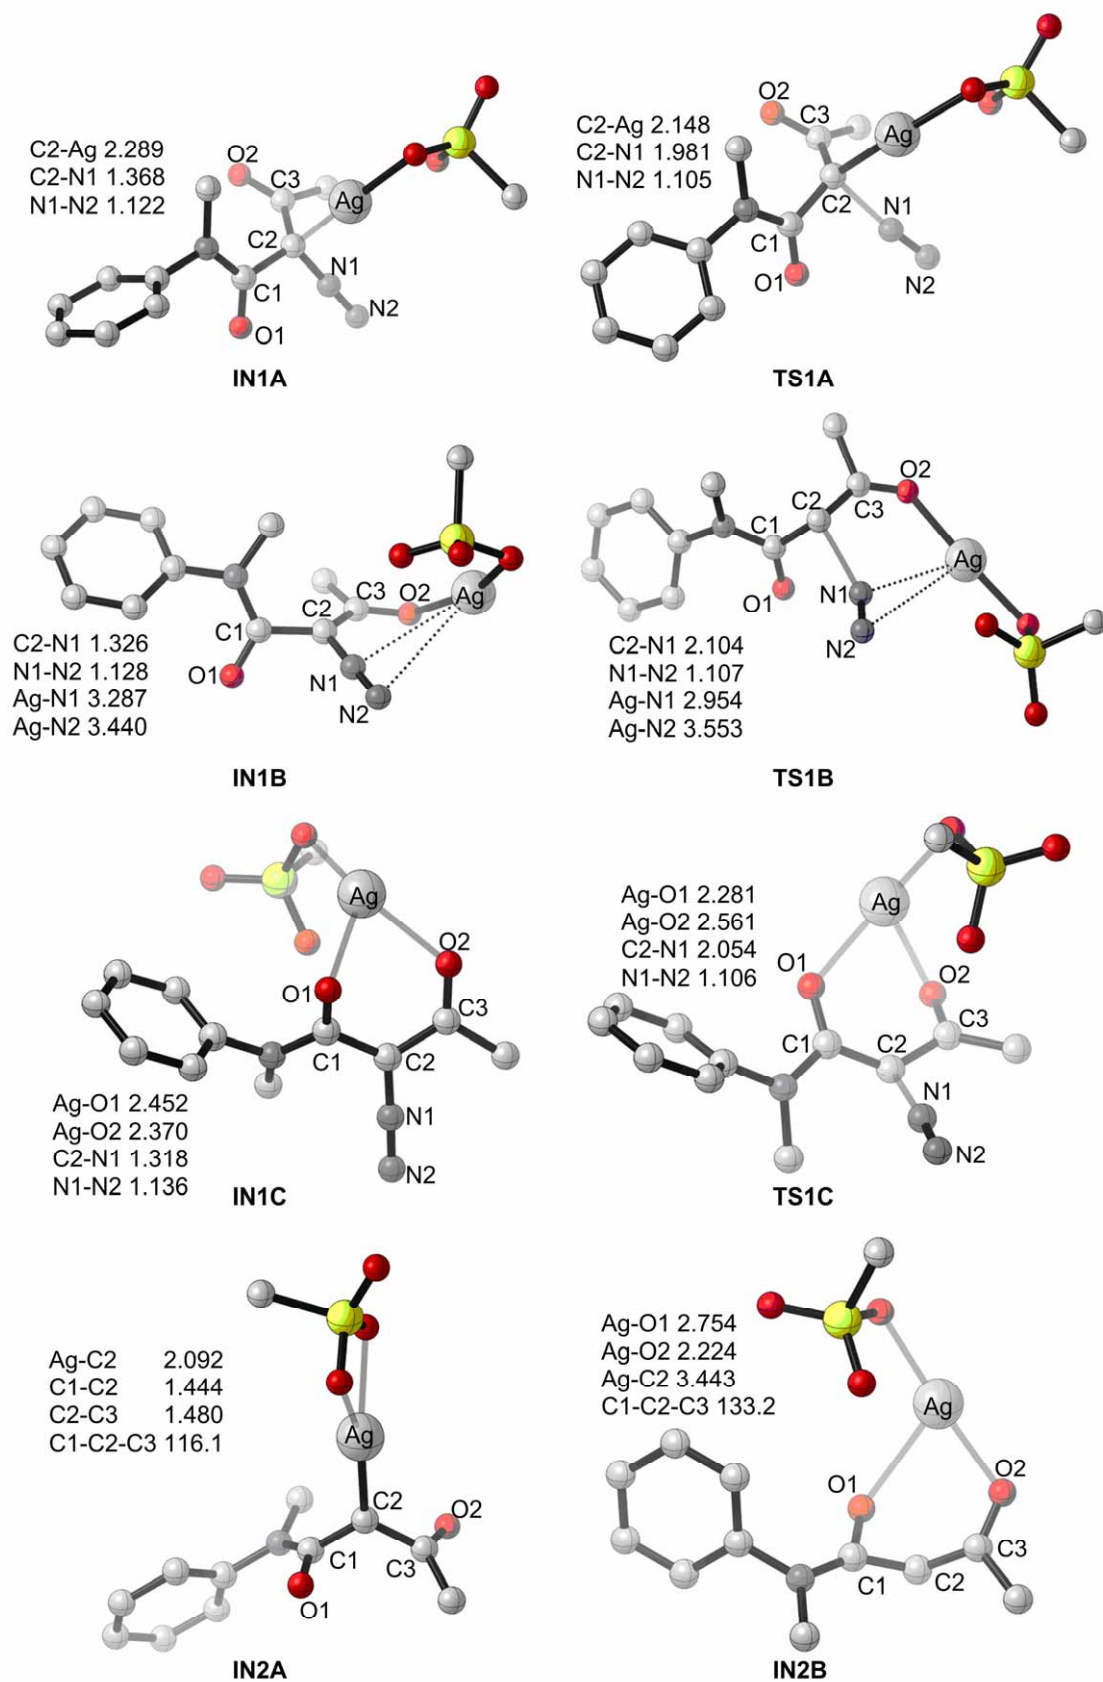

**Figure S1.** Geometries of key intermediates and transition states in N<sub>2</sub> dissociation step (hydrogens and fluorines are omitted for clarity; bond lengths in angstrom and bond angles in degree).

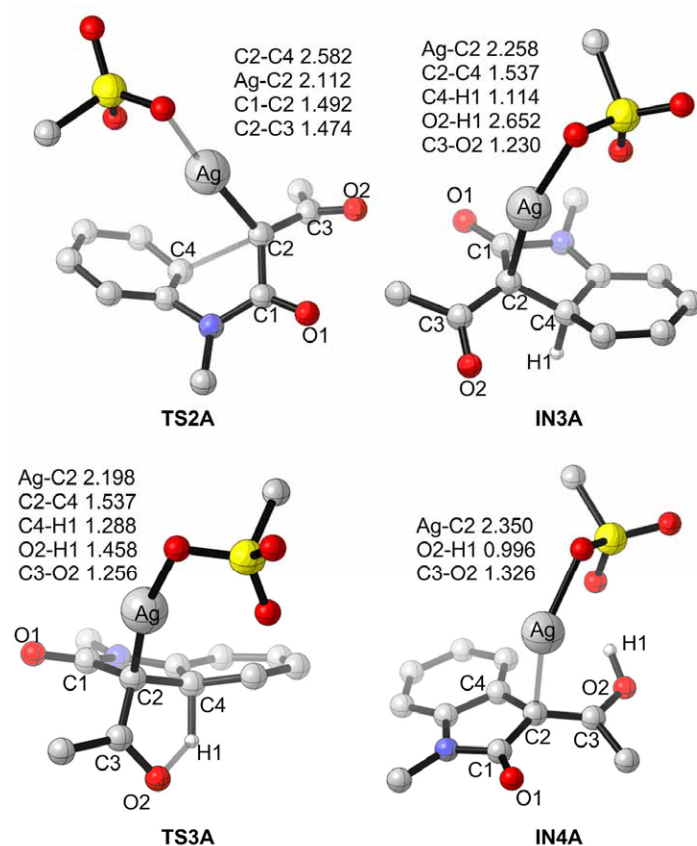

**Figure S2.** Geometries of key intermediates and transition states in the cyclization step (hydrogens and fluorines are omitted for clarity; bond lengths in angstrom and bond angles in degree).

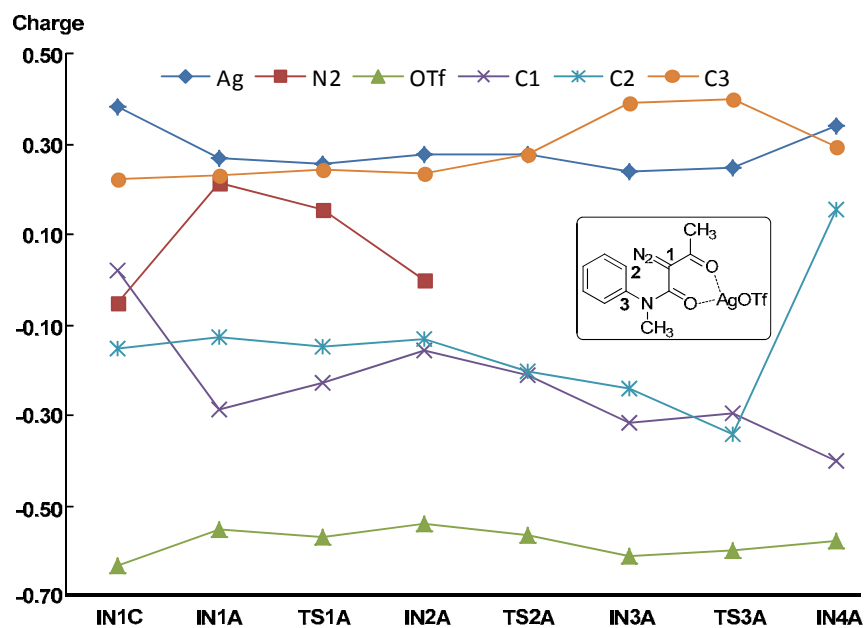

**Figure S3.** Charge distribution of key atoms along the reaction coordinate. C1, C2, and C3 are defined as in the structure of IN1C in this figure.

### 3. Computational methodologies

All calculations were performed with Gaussian 03 package.<sup>1</sup> Geometries were optimized in gas phase at the level of B3LYP density functional with LANL2DZ basis set for Ag, and 6-31G\* basis sets for the other atoms. The minima and transition states were confirmed by frequency analysis. The thermodynamic correction for gas phase Gibbs free energy (TCG) was obtained in frequency calculation. Single point calculations were calculated by B3LYP functional with LANL2DZ+p basis set<sup>2</sup> for Ag, and 6-31+G\* basis set for the other atoms. The solvation free energy was calculated by CPCM model with UAHF radii.<sup>3</sup> The parameters for THF solvent was used to model dioxane solvent that was used in experimental report. The Gibbs free energy was calculated by adding TCG and solvation free energy to the single point energy. All charge distribution discussed in this work was calculated by Mulliken population analysis.

1. M. J. Frisch, et al *Gaussian 03 (Revision D.01)*; Gaussian, Inc.: Wallingford, CT and Pittsburgh, PA., 2004.
2. A. Hollwarth, M. Bohme, S. Dapprich, A. W. Ehlers, A. Gobbi, V. Jonas, K. F. Kohler, R. Stegmann, A. Veldkamp and G. Frenking, *Chem. Phys. Lett.*, 1993, **208**, 237.
3. Y. Fu, K. Shen, L. Liu and Q. X. Guo, *J. Am. Chem. Soc.*, 2007, **129**, 13510-13519.

### 4. Energies of Intermediates and Transition States

**Table 1.** Electronic Energies (E), Thermal Correction for Gibbs Free Energies (TCG), Solvation Free Energies ( $\Delta G_{\text{sol}}$ ), and Free Energies in Solution ( $G_{\text{sol}}$ )\*.

|             | E (Hartree)  | TCG (Hartree) | $\Delta G_{\text{sol}}$ (kcal/mol) | $G_{\text{sol}}$ (Hartree) |
|-------------|--------------|---------------|------------------------------------|----------------------------|
| <b>1</b>    | -740.458252  | 0.163406      | -0.97                              | -740.293364                |
| <b>IN1A</b> | -1847.706407 | 0.171926      | 2.43                               | -1847.527581               |
| <b>IN1B</b> | -1847.718288 | 0.173183      | 3.11                               | -1847.537121               |
| <b>IN1C</b> | -1847.728671 | 0.173416      | 3.53                               | -1847.546602               |
| <b>TS1A</b> | -1847.680904 | 0.168098      | 2.48                               | -1847.505826               |
| <b>TS1B</b> | -1847.664758 | 0.167273      | -1.01                              | -1847.496067               |
| <b>TS1C</b> | -1847.668594 | 0.168465      | 2.28                               | -1847.493468               |
| <b>TS1D</b> | -740.396924  | 0.158651      | -1.62                              | -740.2378268               |
| <b>IN2A</b> | -1738.182223 | 0.163396      | -0.03                              | -1738.015847               |
| <b>IN2B</b> | -1738.168413 | 0.166602      | 1.66                               | -1737.996138               |
| <b>TS2A</b> | -1738.174713 | 0.166216      | -0.76                              | -1738.00668                |
| <b>IN3A</b> | -1738.235331 | 0.169056      | -0.94                              | -1738.064745               |
| <b>TS3A</b> | -1738.219373 | 0.167175      | -0.7                               | -1738.050286               |
| <b>IN4A</b> | -1738.27835  | 0.17338       | 1.38                               | -1738.099743               |
| <b>TS4</b>  | -1738.151985 | 0.16469       | -2.88                              | -1737.988857               |
| <b>2</b>    | -631.038182  | 0.162505      | -1.52                              | -630.8750714               |
| <b>3</b>    | -631.033108  | 0.162487      | -1.66                              | -630.8702385               |
| <b>TS5</b>  | -631.030054  | 0.157738      | -1.69                              | -630.8719813               |

$*G_{\text{sol}} = E + \text{TCG} + (\Delta G + 1.9)/627.51$ , where 1.9 kcal/mol comes from the thermal correction from the standard solution state (1mol/L) to the standard state (1/22.4 mol/L), see Fu, Y.; Liu, L.; Li, R. Q.; Liu, R.; Guo, Q. X. *J. Am. Chem. Soc.* **2004**, *126*, 814.

## 5. Cartesian Coordinates of Intermediates and Transition States

|   |              |              |              |
|---|--------------|--------------|--------------|
| 1 |              |              |              |
| 6 | -3.719380000 | -1.263657000 | -0.094618000 |
| 6 | -2.348338000 | -1.198895000 | 0.155783000  |
| 6 | -1.705009000 | 0.045351000  | 0.175778000  |
| 6 | -2.447973000 | 1.211999000  | -0.048244000 |
| 6 | -3.819792000 | 1.137742000  | -0.288757000 |
| 6 | -4.460851000 | -0.101595000 | -0.315023000 |
| 1 | -4.209445000 | -2.233289000 | -0.112025000 |
| 1 | -1.775814000 | -2.101748000 | 0.318279000  |
| 1 | -1.952690000 | 2.178513000  | -0.044608000 |
| 1 | -4.383147000 | 2.050342000  | -0.463109000 |
| 1 | -5.528558000 | -0.161314000 | -0.506530000 |
| 7 | -0.301246000 | 0.172314000  | 0.463277000  |
| 6 | 0.050805000  | 1.078105000  | 1.562221000  |
| 1 | 1.070681000  | 0.877536000  | 1.891517000  |
| 1 | -0.023082000 | 2.132361000  | 1.275237000  |
| 1 | -0.628584000 | 0.899625000  | 2.401684000  |
| 6 | 0.613955000  | -0.667988000 | -0.147933000 |
| 8 | 0.297252000  | -1.667455000 | -0.782350000 |
| 6 | 2.066047000  | -0.303075000 | -0.005097000 |
| 6 | 2.810645000  | 0.946836000  | -0.288538000 |
| 8 | 4.029169000  | 0.984982000  | -0.188111000 |
| 6 | 2.024930000  | 2.159168000  | -0.761294000 |
| 1 | 0.998151000  | 1.930608000  | -1.054037000 |
| 1 | 2.562120000  | 2.590517000  | -1.610792000 |
| 1 | 2.012597000  | 2.915490000  | 0.031854000  |
| 7 | 2.856169000  | -1.357582000 | 0.131313000  |
| 7 | 3.567390000  | -2.226561000 | 0.258344000  |

### IN1A

|   |             |              |              |
|---|-------------|--------------|--------------|
| 6 | 5.683019000 | -2.407710000 | 0.378136000  |
| 6 | 4.388772000 | -1.908666000 | 0.228091000  |
| 6 | 4.203428000 | -0.578286000 | -0.152156000 |
| 6 | 5.299464000 | 0.254570000  | -0.383954000 |
| 6 | 6.591772000 | -0.249733000 | -0.231326000 |
| 6 | 6.784239000 | -1.579883000 | 0.147929000  |
| 1 | 5.830042000 | -3.441417000 | 0.677701000  |
| 1 | 3.524425000 | -2.540855000 | 0.410463000  |
| 1 | 5.133766000 | 1.287621000  | -0.675573000 |
| 1 | 7.446468000 | 0.396903000  | -0.408181000 |
| 1 | 7.790942000 | -1.970765000 | 0.265791000  |
| 7 | 2.865764000 | -0.069009000 | -0.362630000 |

|    |              |              |              |
|----|--------------|--------------|--------------|
| 6  | 2.359406000  | -0.210333000 | -1.728891000 |
| 1  | 1.295662000  | 0.027489000  | -1.784807000 |
| 1  | 2.887084000  | 0.458267000  | -2.414292000 |
| 1  | 2.503003000  | -1.246989000 | -2.048885000 |
| 6  | 2.258130000  | 0.510459000  | 0.710358000  |
| 8  | 2.727413000  | 0.503866000  | 1.840593000  |
| 6  | 0.890207000  | 1.203777000  | 0.497131000  |
| 6  | 0.756320000  | 2.412766000  | -0.440686000 |
| 8  | 1.556394000  | 2.532718000  | -1.344690000 |
| 6  | -0.378915000 | 3.385205000  | -0.198090000 |
| 1  | -1.349750000 | 2.875006000  | -0.181137000 |
| 1  | -0.368407000 | 4.123395000  | -1.001686000 |
| 1  | -0.249576000 | 3.907189000  | 0.758477000  |
| 47 | -0.724565000 | -0.200443000 | -0.315593000 |
| 8  | -3.051618000 | 1.022662000  | -0.345082000 |
| 16 | -3.624380000 | -0.274840000 | -0.809877000 |
| 8  | -4.656476000 | -0.248145000 | -1.839840000 |
| 8  | -2.496577000 | -1.274345000 | -1.055692000 |
| 6  | -4.414129000 | -0.977383000 | 0.720526000  |
| 9  | -5.394219000 | -0.176525000 | 1.145166000  |
| 9  | -4.911498000 | -2.191372000 | 0.480571000  |
| 9  | -3.487749000 | -1.075077000 | 1.694128000  |
| 7  | 0.379009000  | 1.461728000  | 1.739179000  |
| 7  | -0.019229000 | 1.679630000  | 2.764818000  |

**IN1B**

|   |              |              |              |
|---|--------------|--------------|--------------|
| 6 | -6.275886000 | 1.063299000  | 1.098964000  |
| 6 | -4.976445000 | 0.557634000  | 1.142662000  |
| 6 | -4.177541000 | 0.600940000  | -0.007642000 |
| 6 | -4.690806000 | 1.158874000  | -1.186929000 |
| 6 | -5.989124000 | 1.666583000  | -1.216689000 |
| 6 | -6.788804000 | 1.618821000  | -0.074194000 |
| 1 | -6.886957000 | 1.026251000  | 1.996474000  |
| 1 | -4.587366000 | 0.126551000  | 2.054339000  |
| 1 | -4.080428000 | 1.193469000  | -2.083957000 |
| 1 | -6.373729000 | 2.095248000  | -2.137928000 |
| 1 | -7.800864000 | 2.012569000  | -0.097407000 |
| 7 | -2.822071000 | 0.118058000  | -0.012220000 |
| 6 | -1.813270000 | 0.955309000  | -0.687356000 |
| 1 | -0.831600000 | 0.819640000  | -0.231804000 |
| 1 | -1.747113000 | 0.741293000  | -1.760859000 |
| 1 | -2.104333000 | 2.000149000  | -0.562511000 |
| 6 | -2.496715000 | -1.051056000 | 0.631387000  |
| 8 | -3.223287000 | -1.666170000 | 1.398093000  |

|    |              |              |              |
|----|--------------|--------------|--------------|
| 6  | -1.109299000 | -1.601482000 | 0.326877000  |
| 6  | -0.596135000 | -2.110939000 | -0.917713000 |
| 8  | 0.563955000  | -2.572813000 | -1.042083000 |
| 6  | -1.513015000 | -2.158798000 | -2.117172000 |
| 1  | -2.502461000 | -1.739968000 | -1.928879000 |
| 1  | -1.621157000 | -3.207571000 | -2.415770000 |
| 1  | -1.037967000 | -1.632408000 | -2.951694000 |
| 7  | -0.365165000 | -1.830722000 | 1.400557000  |
| 7  | 0.273852000  | -2.033343000 | 2.307947000  |
| 47 | 2.402313000  | -1.556592000 | -0.351994000 |
| 8  | 1.344722000  | 0.707607000  | 0.685056000  |
| 16 | 2.761383000  | 1.134081000  | 0.880404000  |
| 8  | 3.113611000  | 1.784236000  | 2.138285000  |
| 8  | 3.709968000  | 0.022460000  | 0.447008000  |
| 6  | 3.025140000  | 2.396986000  | -0.457974000 |
| 9  | 2.201609000  | 3.435085000  | -0.277353000 |
| 9  | 4.285296000  | 2.832999000  | -0.456373000 |
| 9  | 2.759365000  | 1.845447000  | -1.656603000 |

#### INIC

|   |              |              |              |
|---|--------------|--------------|--------------|
| 6 | -2.009791000 | -3.788429000 | -0.100994000 |
| 6 | -1.617217000 | -2.533705000 | 0.367679000  |
| 6 | -2.545371000 | -1.489284000 | 0.376397000  |
| 6 | -3.850285000 | -1.687621000 | -0.078790000 |
| 6 | -4.231587000 | -2.944417000 | -0.549821000 |
| 6 | -3.312812000 | -3.996273000 | -0.558820000 |
| 1 | -1.286463000 | -4.598399000 | -0.114705000 |
| 1 | -0.598490000 | -2.368879000 | 0.704947000  |
| 1 | -4.556680000 | -0.862622000 | -0.063691000 |
| 1 | -5.246302000 | -3.100785000 | -0.905062000 |
| 1 | -3.611510000 | -4.974991000 | -0.923996000 |
| 7 | -2.166664000 | -0.189070000 | 0.889054000  |
| 6 | -1.852839000 | -0.099523000 | 2.322552000  |
| 1 | -1.045453000 | 0.614090000  | 2.490983000  |
| 1 | -2.735965000 | 0.169527000  | 2.915144000  |
| 1 | -1.496466000 | -1.076113000 | 2.651416000  |
| 6 | -1.857400000 | 0.778640000  | -0.015287000 |
| 8 | -1.763169000 | 0.574312000  | -1.231584000 |
| 6 | -1.662518000 | 2.184683000  | 0.486814000  |
| 6 | -0.783294000 | 3.173592000  | -0.151215000 |
| 8 | -0.028883000 | 2.877933000  | -1.079205000 |
| 6 | -0.810558000 | 4.595266000  | 0.374959000  |
| 1 | -1.811020000 | 5.034073000  | 0.278982000  |
| 1 | -0.100112000 | 5.190069000  | -0.200398000 |



|    |              |              |              |
|----|--------------|--------------|--------------|
| 1  | -0.531038000 | 4.629552000  | 1.434870000  |
| 7  | -2.438428000 | 2.605191000  | 1.465488000  |
| 7  | -3.126646000 | 2.942841000  | 2.304165000  |
| 47 | 0.641113000  | 0.690619000  | -1.698168000 |
| 8  | 1.099580000  | -0.153273000 | 0.887233000  |
| 8  | 2.216634000  | -0.853048000 | -1.211944000 |
| 16 | 2.064852000  | -1.109253000 | 0.273575000  |
| 8  | 1.917825000  | -2.520117000 | 0.647233000  |
| 6  | 3.716774000  | -0.579637000 | 0.941350000  |
| 9  | 3.736760000  | -0.723677000 | 2.272071000  |
| 9  | 4.696195000  | -1.316523000 | 0.410657000  |
| 9  | 3.937842000  | 0.710699000  | 0.647765000  |

**TS1A**

|    |              |              |              |
|----|--------------|--------------|--------------|
| 6  | 5.896536000  | -2.190799000 | 0.367311000  |
| 6  | 4.590517000  | -1.712621000 | 0.272499000  |
| 6  | 4.353861000  | -0.460184000 | -0.305297000 |
| 6  | 5.422357000  | 0.306041000  | -0.783331000 |
| 6  | 6.725154000  | -0.184825000 | -0.691625000 |
| 6  | 6.966027000  | -1.432614000 | -0.114972000 |
| 1  | 6.076379000  | -3.163587000 | 0.815968000  |
| 1  | 3.760426000  | -2.300125000 | 0.645388000  |
| 1  | 5.238906000  | 1.284745000  | -1.215800000 |
| 1  | 7.550522000  | 0.414605000  | -1.064957000 |
| 1  | 7.980992000  | -1.812316000 | -0.040591000 |
| 7  | 3.009838000  | 0.035973000  | -0.458130000 |
| 6  | 2.643813000  | 0.552221000  | -1.783687000 |
| 1  | 1.562070000  | 0.480280000  | -1.926985000 |
| 1  | 2.930351000  | 1.598194000  | -1.914088000 |
| 1  | 3.135169000  | -0.069053000 | -2.535124000 |
| 6  | 2.220595000  | 0.132866000  | 0.656571000  |
| 8  | 2.520586000  | -0.319535000 | 1.756685000  |
| 6  | 0.883772000  | 0.832640000  | 0.468986000  |
| 6  | 0.818038000  | 2.308297000  | 0.606149000  |
| 8  | 1.580800000  | 2.866522000  | -0.174693000 |
| 6  | -0.165333000 | 3.023477000  | 1.492832000  |
| 1  | -1.175268000 | 2.612627000  | 1.377512000  |
| 1  | -0.161561000 | 4.081022000  | 1.220391000  |
| 1  | 0.127054000  | 2.928062000  | 2.545617000  |
| 47 | -0.792593000 | 0.114234000  | -0.664968000 |
| 8  | -3.099101000 | 1.013931000  | 0.440984000  |
| 16 | -3.758502000 | 0.204887000  | -0.620111000 |
| 8  | -4.913074000 | 0.768869000  | -1.310796000 |
| 8  | -2.705560000 | -0.407551000 | -1.544679000 |

|   |              |              |              |
|---|--------------|--------------|--------------|
| 6 | -4.364872000 | -1.305746000 | 0.279157000  |
| 9 | -5.274500000 | -0.965197000 | 1.195903000  |
| 9 | -4.906699000 | -2.177016000 | -0.573392000 |
| 9 | -3.329599000 | -1.900713000 | 0.903266000  |
| 7 | 0.118966000  | 0.209184000  | 2.186749000  |
| 7 | -0.421944000 | -0.231690000 | 3.044007000  |

**TS1B**

|    |              |              |              |
|----|--------------|--------------|--------------|
| 6  | -6.584992000 | -2.193233000 | -0.753095000 |
| 6  | -5.390230000 | -1.670860000 | -0.258284000 |
| 6  | -5.361566000 | -0.357559000 | 0.237409000  |
| 6  | -6.537526000 | 0.409366000  | 0.238502000  |
| 6  | -7.725595000 | -0.128662000 | -0.251013000 |
| 6  | -7.754163000 | -1.431505000 | -0.752163000 |
| 1  | -6.597728000 | -3.210470000 | -1.133675000 |
| 1  | -4.490238000 | -2.268361000 | -0.255689000 |
| 1  | -6.526835000 | 1.429230000  | 0.608364000  |
| 1  | -8.627663000 | 0.476435000  | -0.245592000 |
| 1  | -8.680339000 | -1.849288000 | -1.135875000 |
| 7  | -4.164082000 | 0.214696000  | 0.778159000  |
| 6  | -4.294004000 | 1.063568000  | 1.968002000  |
| 1  | -3.312472000 | 1.170457000  | 2.434497000  |
| 1  | -4.675945000 | 2.063515000  | 1.732007000  |
| 1  | -4.983342000 | 0.584803000  | 2.668281000  |
| 6  | -2.942386000 | -0.013698000 | 0.176490000  |
| 8  | -2.711838000 | -0.884653000 | -0.657117000 |
| 6  | -1.832895000 | 0.843338000  | 0.635752000  |
| 6  | -1.185301000 | 1.878086000  | -0.030631000 |
| 8  | -0.039524000 | 1.990697000  | -0.512677000 |
| 6  | -2.082367000 | 3.126700000  | -0.032640000 |
| 1  | -3.078383000 | 2.978780000  | 0.390163000  |
| 1  | -2.179085000 | 3.442890000  | -1.076250000 |
| 1  | -1.566238000 | 3.908712000  | 0.532204000  |
| 7  | -0.365039000 | -0.653301000 | 0.820565000  |
| 7  | 0.007480000  | -1.519429000 | 1.399891000  |
| 47 | 1.701909000  | 0.692105000  | -0.805453000 |
| 8  | 2.955802000  | -0.761202000 | 1.100668000  |
| 16 | 3.916875000  | -1.123017000 | 0.023928000  |
| 8  | 4.355569000  | -2.512402000 | -0.080545000 |
| 8  | 3.477191000  | -0.495724000 | -1.295752000 |
| 6  | 5.438465000  | -0.129758000 | 0.416940000  |
| 9  | 5.964283000  | -0.529115000 | 1.579367000  |
| 9  | 6.354481000  | -0.270929000 | -0.545258000 |
| 9  | 5.117655000  | 1.172313000  | 0.516610000  |

**TS1C**

|    |              |              |              |
|----|--------------|--------------|--------------|
| 6  | 4.461894000  | -2.269684000 | -1.306398000 |
| 6  | 3.894529000  | -1.004240000 | -1.156137000 |
| 6  | 3.542870000  | -0.555172000 | 0.120877000  |
| 6  | 3.762325000  | -1.364580000 | 1.239837000  |
| 6  | 4.334299000  | -2.626982000 | 1.081174000  |
| 6  | 4.684405000  | -3.081261000 | -0.191771000 |
| 1  | 4.731391000  | -2.620030000 | -2.298578000 |
| 1  | 3.719013000  | -0.369745000 | -2.016950000 |
| 1  | 3.473296000  | -1.013836000 | 2.226395000  |
| 1  | 4.497832000  | -3.256126000 | 1.951241000  |
| 1  | 5.126625000  | -4.065652000 | -0.315250000 |
| 7  | 3.000974000  | 0.766293000  | 0.318999000  |
| 6  | 3.854135000  | 1.716839000  | 1.039740000  |
| 1  | 3.501118000  | 2.732266000  | 0.852153000  |
| 1  | 3.857412000  | 1.529529000  | 2.119566000  |
| 1  | 4.878076000  | 1.615045000  | 0.668927000  |
| 6  | 1.820151000  | 1.107171000  | -0.284631000 |
| 8  | 1.338914000  | 0.396703000  | -1.192483000 |
| 6  | 1.197581000  | 2.374578000  | 0.099696000  |
| 6  | -0.102051000 | 2.866443000  | -0.169727000 |
| 8  | -0.326399000 | 2.770106000  | -1.396578000 |
| 6  | -1.051334000 | 3.516820000  | 0.792228000  |
| 1  | -0.536697000 | 4.126174000  | 1.540442000  |
| 1  | -1.627645000 | 2.728847000  | 1.293216000  |
| 1  | -1.740115000 | 4.142191000  | 0.219181000  |
| 47 | -0.894835000 | 0.284501000  | -1.638752000 |
| 8  | -1.923768000 | 0.404598000  | 0.945399000  |
| 16 | -3.094804000 | -0.305204000 | 0.354128000  |
| 8  | -4.425532000 | 0.083459000  | 0.817201000  |
| 8  | -2.955402000 | -0.426963000 | -1.152223000 |
| 6  | -2.850845000 | -2.065352000 | 0.900009000  |
| 9  | -2.880320000 | -2.146333000 | 2.235814000  |
| 9  | -3.804190000 | -2.854405000 | 0.397687000  |
| 9  | -1.655182000 | -2.512956000 | 0.473467000  |
| 7  | 1.157117000  | 2.202653000  | 2.145778000  |
| 7  | 1.242017000  | 2.184708000  | 3.248415000  |

**TS1D**

|   |              |              |              |
|---|--------------|--------------|--------------|
| 6 | -3.589869000 | -1.446635000 | -0.316916000 |
| 6 | -2.260260000 | -1.280094000 | 0.071668000  |
| 6 | -1.727649000 | 0.013731000  | 0.200187000  |
| 6 | -2.555694000 | 1.120445000  | -0.054896000 |

|   |              |              |              |
|---|--------------|--------------|--------------|
| 6 | -3.883453000 | 0.939540000  | -0.436711000 |
| 6 | -4.408607000 | -0.346365000 | -0.572613000 |
| 1 | -3.987103000 | -2.453749000 | -0.410685000 |
| 1 | -1.635492000 | -2.137781000 | 0.270141000  |
| 1 | -2.161497000 | 2.127537000  | 0.030857000  |
| 1 | -4.504536000 | 1.809307000  | -0.633301000 |
| 1 | -5.443491000 | -0.488035000 | -0.871171000 |
| 7 | -0.378626000 | 0.252443000  | 0.615417000  |
| 6 | -0.163275000 | 1.374342000  | 1.536424000  |
| 1 | 0.802486000  | 1.248476000  | 2.024278000  |
| 1 | -0.172251000 | 2.346394000  | 1.027970000  |
| 1 | -0.958814000 | 1.371269000  | 2.286881000  |
| 6 | 0.656537000  | -0.593505000 | 0.219370000  |
| 8 | 0.469992000  | -1.704234000 | -0.266562000 |
| 6 | 2.031566000  | -0.074261000 | 0.475452000  |
| 6 | 3.189163000  | -0.761296000 | 0.004138000  |
| 8 | 3.284246000  | -1.823399000 | 0.629069000  |
| 6 | 4.217530000  | -0.272848000 | -0.985153000 |
| 1 | 4.573719000  | 0.730722000  | -0.728125000 |
| 1 | 3.792658000  | -0.230602000 | -1.994765000 |
| 1 | 5.060255000  | -0.967952000 | -0.977723000 |
| 7 | 2.022541000  | 1.664204000  | -0.551921000 |
| 7 | 2.008119000  | 2.772946000  | -0.602083000 |

#### IN2A

|   |              |              |              |
|---|--------------|--------------|--------------|
| 6 | -4.431098339 | -2.832820214 | -1.043083078 |
| 6 | -3.456127264 | -1.911264147 | -0.661154050 |
| 6 | -3.787615291 | -0.896513066 | 0.241372018  |
| 6 | -5.080263386 | -0.802505061 | 0.764477056  |
| 6 | -6.044284446 | -1.736235131 | 0.385375029  |
| 6 | -5.722576429 | -2.750708209 | -0.519002039 |
| 1 | -4.175202319 | -3.619856276 | -1.746113135 |
| 1 | -2.449313185 | -1.976388150 | -1.059715082 |
| 1 | -5.334660401 | -0.001953000 | 1.452581113  |
| 1 | -7.048711549 | -1.664541129 | 0.792101061  |
| 1 | -6.476527483 | -3.474362267 | -0.814564063 |
| 7 | -2.784651215 | 0.053673004  | 0.656166051  |
| 6 | -2.473459188 | 0.199136015  | 2.086163160  |
| 1 | -1.722764131 | 0.980966077  | 2.216157171  |
| 1 | -3.370249258 | 0.490060038  | 2.638340204  |
| 1 | -2.096539162 | -0.748706055 | 2.481826190  |
| 6 | -2.095503160 | 0.738746055  | -0.255160019 |
| 8 | -2.197994167 | 0.752401056  | -1.501859115 |
| 6 | -0.980338076 | 1.646670125  | -0.121829009 |

|    |              |              |              |
|----|--------------|--------------|--------------|
| 6  | -1.321227101 | 3.081456235  | 0.006819001  |
| 8  | -1.330191099 | 3.444802262  | 1.176089091  |
| 6  | -1.570581120 | 3.949053299  | -1.189890092 |
| 1  | -0.655481053 | 4.018308308  | -1.790365138 |
| 1  | -1.874577146 | 4.945924376  | -0.862427066 |
| 1  | -2.337279181 | 3.497077269  | -1.828945139 |
| 47 | 1.000715078  | 0.975908074  | -0.111635009 |
| 8  | 2.876431220  | 0.168576013  | -1.272439097 |
| 16 | 3.666606281  | -0.134891010 | -0.024604002 |
| 8  | 5.095581390  | 0.155543012  | -0.049599004 |
| 8  | 2.879056219  | 0.367848028  | 1.159536088  |
| 6  | 3.512021267  | -1.981597154 | 0.129168010  |
| 9  | 4.079795312  | -2.588734197 | -0.915634071 |
| 9  | 4.095330311  | -2.407796182 | 1.252296097  |
| 9  | 2.209075170  | -2.321862178 | 0.167238013  |

#### IN2B

|    |              |              |              |
|----|--------------|--------------|--------------|
| 6  | -3.904548297 | 3.503975269  | -0.608536045 |
| 6  | -4.092571313 | 2.177119167  | -0.223511017 |
| 6  | -2.988382228 | 1.431630107  | 0.198597015  |
| 6  | -1.708776129 | 1.984630154  | 0.239806018  |
| 6  | -1.529882119 | 3.308018251  | -0.169554013 |
| 6  | -2.624661200 | 4.066876312  | -0.585940045 |
| 1  | -4.755688361 | 4.092117311  | -0.939482073 |
| 1  | -5.078793390 | 1.723260134  | -0.266862020 |
| 1  | -0.859305063 | 1.400352107  | 0.580464044  |
| 1  | -0.526129040 | 3.720791285  | -0.162389012 |
| 1  | -2.482759187 | 5.097461388  | -0.898838070 |
| 7  | -3.184702241 | 0.051972004  | 0.603527044  |
| 6  | -3.984097306 | -0.249669019 | 1.796425138  |
| 1  | -4.122643313 | -1.330343100 | 1.874714144  |
| 1  | -3.476617266 | 0.124038009  | 2.690898205  |
| 1  | -4.962876378 | 0.228112018  | 1.713099132  |
| 6  | -2.586114198 | -0.919672069 | -0.052618004 |
| 8  | -1.808357138 | -0.910524071 | -1.081117084 |
| 6  | -2.431850188 | -2.286036175 | -0.157210012 |
| 6  | -1.459295113 | -3.189370245 | 0.331498026  |
| 8  | -0.318099024 | -3.341971253 | -0.160563012 |
| 6  | -1.927933146 | -4.111517314 | 1.438938109  |
| 1  | -2.910003224 | -3.833089291 | 1.834228143  |
| 1  | -1.185137091 | -4.097195311 | 2.242938170  |
| 1  | -1.988057154 | -5.134178393 | 1.050473080  |
| 47 | 0.836324065  | -1.581242121 | -0.899917067 |
| 8  | 2.181582168  | 0.164258012  | -1.244595097 |

|    |             |              |              |
|----|-------------|--------------|--------------|
| 16 | 2.031570155 | 1.038216081  | -0.013374001 |
| 8  | 1.782187137 | 2.457001189  | -0.288478022 |
| 8  | 1.151218088 | 0.380446029  | 0.993362075  |
| 6  | 3.729183285 | 0.960044076  | 0.740363057  |
| 9  | 4.636377355 | 1.472927111  | -0.095353007 |
| 9  | 3.751402284 | 1.652781127  | 1.884654146  |
| 9  | 4.053762311 | -0.314381024 | 1.002670076  |

**TS2A**

|    |              |              |              |
|----|--------------|--------------|--------------|
| 6  | 1.701194000  | 1.874743000  | 0.186458000  |
| 6  | 2.024944000  | 1.319937000  | 1.443203000  |
| 6  | 1.122900000  | 1.435740000  | 2.513397000  |
| 6  | -0.070124000 | 2.123229000  | 2.340798000  |
| 6  | -0.365753000 | 2.712639000  | 1.100467000  |
| 6  | 0.507362000  | 2.594515000  | 0.024833000  |
| 6  | 2.927567000  | 0.276943000  | -1.062331000 |
| 6  | 2.263832000  | -0.698159000 | -0.148964000 |
| 1  | 1.375880000  | 1.007283000  | 3.478496000  |
| 1  | -0.776544000 | 2.207711000  | 3.159632000  |
| 1  | -1.308579000 | 3.232629000  | 0.964224000  |
| 1  | 0.246561000  | 3.009615000  | -0.942939000 |
| 7  | 2.563059000  | 1.594588000  | -0.890269000 |
| 6  | 2.895596000  | 2.572387000  | -1.923035000 |
| 1  | 2.075320000  | 2.694882000  | -2.640604000 |
| 1  | 3.123172000  | 3.534595000  | -1.458579000 |
| 1  | 3.770576000  | 2.200248000  | -2.458973000 |
| 8  | 3.663582000  | -0.141215000 | -1.943904000 |
| 6  | 3.048600000  | -1.750467000 | 0.520685000  |
| 8  | 3.525565000  | -2.550065000 | -0.272297000 |
| 6  | 3.165475000  | -1.867789000 | 2.018685000  |
| 1  | 3.920738000  | -1.165337000 | 2.393931000  |
| 1  | 2.215701000  | -1.640799000 | 2.512697000  |
| 1  | 3.484307000  | -2.883654000 | 2.264686000  |
| 47 | 0.185894000  | -1.037879000 | -0.309889000 |
| 1  | 3.029098000  | 0.945435000  | 1.611628000  |
| 8  | -1.891043000 | -1.556149000 | -0.952507000 |
| 16 | -2.713108000 | -0.999436000 | 0.195142000  |
| 8  | -3.864831000 | -1.798256000 | 0.600440000  |
| 8  | -1.791235000 | -0.499353000 | 1.258927000  |
| 6  | -3.409788000 | 0.560296000  | -0.542420000 |
| 9  | -4.056711000 | 1.267460000  | 0.392144000  |
| 9  | -2.407803000 | 1.325900000  | -1.026035000 |
| 9  | -4.250160000 | 0.284724000  | -1.540080000 |

### IN3A

|    |              |              |              |
|----|--------------|--------------|--------------|
| 6  | -1.642238000 | 1.616454000  | 0.982885000  |
| 6  | -2.498422000 | 0.956258000  | -0.049310000 |
| 6  | -2.474495000 | 1.612003000  | -1.389221000 |
| 6  | -1.960761000 | 2.856662000  | -1.526552000 |
| 6  | -1.350748000 | 3.529123000  | -0.402711000 |
| 6  | -1.198917000 | 2.954223000  | 0.833332000  |
| 6  | -1.742665000 | -0.627150000 | 1.557035000  |
| 6  | -2.239297000 | -0.541234000 | 0.181357000  |
| 1  | -2.985771000 | 1.092331000  | -2.192289000 |
| 1  | -1.996439000 | 3.372259000  | -2.480791000 |
| 1  | -0.952754000 | 4.527942000  | -0.562059000 |
| 1  | -0.646095000 | 3.452058000  | 1.621209000  |
| 7  | -1.333144000 | 0.755057000  | 1.931530000  |
| 6  | -0.490037000 | 0.993839000  | 3.096864000  |
| 1  | 0.542250000  | 1.138047000  | 2.763519000  |
| 1  | -0.843861000 | 1.867881000  | 3.649460000  |
| 1  | -0.559348000 | 0.104073000  | 3.724057000  |
| 8  | -1.619779000 | -1.528814000 | 2.359478000  |
| 6  | -3.268725000 | -1.468489000 | -0.345956000 |
| 8  | -4.108758000 | -1.041235000 | -1.136396000 |
| 6  | -3.253657000 | -2.923058000 | 0.083441000  |
| 1  | -2.396534000 | -3.442793000 | -0.362436000 |
| 1  | -3.147072000 | -3.015778000 | 1.168594000  |
| 1  | -4.173946000 | -3.399815000 | -0.260364000 |
| 47 | -0.253583000 | -0.924835000 | -0.821901000 |
| 1  | -3.550961000 | 1.137925000  | 0.268901000  |
| 8  | 1.826568000  | -0.638474000 | -1.482831000 |
| 16 | 2.436233000  | 0.453550000  | -0.615669000 |
| 8  | 3.192236000  | 1.463358000  | -1.354736000 |
| 8  | 1.460928000  | 0.933651000  | 0.402676000  |
| 6  | 3.681463000  | -0.507107000 | 0.374888000  |
| 9  | 4.297663000  | 0.304355000  | 1.243309000  |
| 9  | 3.063529000  | -1.479735000 | 1.064496000  |
| 9  | 4.594654000  | -1.060854000 | -0.425617000 |

### TS3A

|   |             |              |              |
|---|-------------|--------------|--------------|
| 6 | 2.748078000 | 1.489279000  | -0.085163000 |
| 6 | 1.874856000 | 0.726908000  | 0.779446000  |
| 6 | 0.867504000 | 1.465092000  | 1.510721000  |
| 6 | 0.963691000 | 2.837050000  | 1.599920000  |
| 6 | 1.960487000 | 3.527570000  | 0.872418000  |
| 6 | 2.845769000 | 2.881956000  | 0.015363000  |
| 6 | 2.780508000 | -0.648325000 | -0.968059000 |

|    |              |              |              |
|----|--------------|--------------|--------------|
| 6  | 1.825083000  | -0.683878000 | 0.188515000  |
| 1  | 0.095475000  | 0.917044000  | 2.042115000  |
| 1  | 0.257729000  | 3.392944000  | 2.207351000  |
| 1  | 2.010271000  | 4.610469000  | 0.951676000  |
| 1  | 3.534883000  | 3.447067000  | -0.602764000 |
| 7  | 3.314750000  | 0.678227000  | -1.020892000 |
| 6  | 4.271605000  | 1.084007000  | -2.038271000 |
| 1  | 3.831261000  | 1.825527000  | -2.713913000 |
| 1  | 5.170278000  | 1.502432000  | -1.574185000 |
| 1  | 4.534791000  | 0.189272000  | -2.604006000 |
| 8  | 3.157531000  | -1.532442000 | -1.711698000 |
| 6  | 2.275481000  | -1.620269000 | 1.238604000  |
| 8  | 2.554223000  | -1.111345000 | 2.352011000  |
| 6  | 2.451267000  | -3.089013000 | 1.002527000  |
| 1  | 1.492984000  | -3.600054000 | 1.154922000  |
| 1  | 2.763035000  | -3.267337000 | -0.031749000 |
| 1  | 3.176893000  | -3.496591000 | 1.709886000  |
| 47 | -0.241943000 | -1.179384000 | -0.372547000 |
| 1  | 2.417468000  | 0.248255000  | 1.844662000  |
| 8  | -2.406730000 | -1.384022000 | -0.586495000 |
| 16 | -3.059134000 | -0.453420000 | 0.428566000  |
| 8  | -4.332471000 | -0.936758000 | 0.954650000  |
| 8  | -2.056932000 | 0.077704000  | 1.387851000  |
| 6  | -3.464042000 | 1.012383000  | -0.641953000 |
| 9  | -3.984803000 | 2.000796000  | 0.094154000  |
| 9  | -2.337798000 | 1.470647000  | -1.227779000 |
| 9  | -4.332680000 | 0.680501000  | -1.599714000 |

#### IN4A

|   |              |              |              |
|---|--------------|--------------|--------------|
| 6 | -2.825177000 | 1.370393000  | -0.139032000 |
| 6 | -1.851563000 | 0.820814000  | 0.729117000  |
| 6 | -1.063518000 | 1.673457000  | 1.503899000  |
| 6 | -1.274954000 | 3.054606000  | 1.416078000  |
| 6 | -2.245125000 | 3.578653000  | 0.557748000  |
| 6 | -3.034149000 | 2.739727000  | -0.239447000 |
| 6 | -3.004107000 | -0.886556000 | -0.440607000 |
| 6 | -1.910427000 | -0.646600000 | 0.538962000  |
| 1 | -0.277908000 | 1.282057000  | 2.141949000  |
| 1 | -0.666007000 | 3.724607000  | 2.014994000  |
| 1 | -2.388890000 | 4.653477000  | 0.499684000  |
| 1 | -3.783732000 | 3.149930000  | -0.908734000 |
| 7 | -3.491036000 | 0.336656000  | -0.823911000 |
| 6 | -4.570725000 | 0.511236000  | -1.778182000 |
| 1 | -5.410970000 | 1.039152000  | -1.314590000 |



|    |              |              |              |
|----|--------------|--------------|--------------|
| 1  | -4.227456000 | 1.078590000  | -2.650312000 |
| 1  | -4.896236000 | -0.480698000 | -2.094563000 |
| 8  | -3.437431000 | -1.996219000 | -0.803622000 |
| 6  | -1.582738000 | -1.701370000 | 1.413548000  |
| 8  | -2.028348000 | -2.915309000 | 1.169893000  |
| 6  | -0.770710000 | -1.561538000 | 2.661364000  |
| 1  | 0.283964000  | -1.377072000 | 2.421956000  |
| 1  | -1.131975000 | -0.711048000 | 3.250527000  |
| 1  | -0.848668000 | -2.478646000 | 3.248541000  |
| 47 | 0.092602000  | -0.823083000 | -0.639686000 |
| 8  | 2.093870000  | -0.663021000 | 1.119309000  |
| 8  | 2.186877000  | -0.863730000 | -1.342517000 |
| 16 | 2.997719000  | -0.659552000 | -0.067920000 |
| 8  | 4.233076000  | -1.432662000 | 0.004521000  |
| 6  | 3.498701000  | 1.123943000  | -0.228681000 |
| 9  | 4.264949000  | 1.303523000  | -1.306311000 |
| 9  | 2.398170000  | 1.889903000  | -0.349815000 |
| 9  | 4.171820000  | 1.516041000  | 0.857225000  |
| 1  | -2.622529000 | -2.877500000 | 0.350704000  |

**TS4**

|   |              |              |              |
|---|--------------|--------------|--------------|
| 6 | -3.104664000 | -3.130567000 | -0.523591000 |
| 6 | -2.551863000 | -1.932714000 | -0.071535000 |
| 6 | -3.398292000 | -0.846307000 | 0.191016000  |
| 6 | -4.782177000 | -0.966951000 | 0.014072000  |
| 6 | -5.320844000 | -2.175515000 | -0.424489000 |
| 6 | -4.483831000 | -3.258927000 | -0.698797000 |
| 1 | -2.447787000 | -3.970532000 | -0.728814000 |
| 1 | -1.482251000 | -1.846132000 | 0.073957000  |
| 1 | -5.435239000 | -0.121440000 | 0.207177000  |
| 1 | -6.394950000 | -2.264907000 | -0.558672000 |
| 1 | -4.904671000 | -4.198268000 | -1.045205000 |
| 7 | -2.864225000 | 0.394461000  | 0.673379000  |
| 6 | -3.558864000 | 1.134341000  | 1.727047000  |
| 1 | -2.836280000 | 1.796466000  | 2.220807000  |
| 1 | -4.384217000 | 1.738941000  | 1.334883000  |
| 1 | -3.947086000 | 0.429495000  | 2.465602000  |
| 6 | -1.738162000 | 0.920592000  | 0.153466000  |
| 8 | -1.007231000 | 0.417449000  | -0.732293000 |
| 6 | -1.095894000 | 2.107746000  | 0.630450000  |
| 6 | -0.909529000 | 3.317480000  | -0.087595000 |
| 8 | 0.100719000  | 3.423301000  | -0.815170000 |
| 6 | -1.868424000 | 4.464183000  | 0.117749000  |
| 1 | -2.378170000 | 4.663894000  | -0.832143000 |

|    |              |              |              |
|----|--------------|--------------|--------------|
| 1  | -1.301893000 | 5.358336000  | 0.396541000  |
| 1  | -2.616645000 | 4.255719000  | 0.889115000  |
| 47 | 1.335490000  | 1.434905000  | -0.438040000 |
| 8  | 3.160381000  | -0.001698000 | -0.946847000 |
| 16 | 3.174362000  | -0.666448000 | 0.403734000  |
| 8  | 4.478244000  | -1.019691000 | 0.957781000  |
| 8  | 2.213946000  | 0.048389000  | 1.316440000  |
| 6  | 2.306747000  | -2.282323000 | 0.085552000  |
| 9  | 3.007985000  | -3.039603000 | -0.761788000 |
| 9  | 2.132182000  | -2.956141000 | 1.227588000  |
| 9  | 1.091750000  | -2.051855000 | -0.457814000 |

## 2

|   |              |              |              |
|---|--------------|--------------|--------------|
| 6 | 1.259333000  | 0.470832000  | -0.002317000 |
| 6 | 0.447167000  | -0.693564000 | 0.001713000  |
| 6 | 1.065240000  | -1.944477000 | 0.007659000  |
| 6 | 2.464073000  | -2.019456000 | 0.004525000  |
| 6 | 3.243608000  | -0.860372000 | -0.002075000 |
| 6 | 2.646440000  | 0.407479000  | -0.004705000 |
| 6 | -0.889402000 | 1.238027000  | 0.003690000  |
| 6 | -0.933795000 | -0.227709000 | 0.002626000  |
| 1 | 0.476890000  | -2.856654000 | 0.017204000  |
| 1 | 2.946144000  | -2.992935000 | 0.008588000  |
| 1 | 4.327219000  | -0.937741000 | -0.003889000 |
| 1 | 3.252270000  | 1.308561000  | -0.008040000 |
| 7 | 0.440386000  | 1.610195000  | -0.001521000 |
| 6 | 0.893008000  | 2.984873000  | -0.003634000 |
| 1 | 1.496899000  | 3.199258000  | 0.886015000  |
| 1 | 1.490653000  | 3.198516000  | -0.897655000 |
| 1 | 0.006523000  | 3.621468000  | -0.000814000 |
| 8 | -1.858471000 | 2.023023000  | 0.006596000  |
| 6 | -2.147574000 | -0.868000000 | -0.002669000 |
| 8 | -3.283788000 | -0.173651000 | 0.001180000  |
| 1 | -3.037230000 | 0.801451000  | 0.007393000  |
| 6 | -2.339444000 | -2.354996000 | -0.010094000 |
| 1 | -1.794912000 | -2.814573000 | -0.842324000 |
| 1 | -1.959022000 | -2.800076000 | 0.917224000  |
| 1 | -3.401995000 | -2.589438000 | -0.103592000 |

## 3

|   |             |              |              |
|---|-------------|--------------|--------------|
| 6 | 1.256935000 | 0.479545000  | 0.000069000  |
| 6 | 0.453740000 | -0.694201000 | -0.000541000 |
| 6 | 1.098750000 | -1.937510000 | -0.000628000 |
| 6 | 2.494276000 | -1.983672000 | -0.000125000 |

|   |              |              |              |
|---|--------------|--------------|--------------|
| 6 | 3.261877000  | -0.810829000 | 0.000409000  |
| 6 | 2.647102000  | 0.443878000  | 0.000516000  |
| 6 | -0.874518000 | 1.156401000  | -0.000551000 |
| 6 | -0.927484000 | -0.248081000 | -0.000822000 |
| 1 | 0.526694000  | -2.860003000 | -0.000889000 |
| 1 | 2.993889000  | -2.948560000 | -0.000119000 |
| 1 | 4.346150000  | -0.874571000 | 0.000761000  |
| 1 | 3.237279000  | 1.355680000  | 0.000886000  |
| 7 | 0.410229000  | 1.599799000  | -0.000055000 |
| 6 | 0.826804000  | 2.989424000  | 0.000301000  |
| 1 | 1.422415000  | 3.211561000  | 0.892574000  |
| 1 | 1.423828000  | 3.211566000  | -0.891021000 |
| 1 | -0.065203000 | 3.616837000  | -0.000394000 |
| 8 | -1.897752000 | 1.989246000  | -0.000620000 |
| 6 | -2.211971000 | -0.886508000 | 0.000363000  |
| 8 | -3.259186000 | -0.193094000 | 0.000890000  |
| 6 | -2.321584000 | -2.394892000 | 0.000237000  |
| 1 | -1.825130000 | -2.818381000 | -0.881371000 |
| 1 | -1.830150000 | -2.817729000 | 0.885012000  |
| 1 | -3.375064000 | -2.681762000 | -0.002465000 |
| 1 | -2.694375000 | 1.356223000  | -0.000115000 |

**TS5**

|   |              |              |              |
|---|--------------|--------------|--------------|
| 6 | 1.257687000  | 0.486887000  | -0.000273000 |
| 6 | 0.478929000  | -0.703379000 | 0.000260000  |
| 6 | 1.140957000  | -1.934526000 | 0.001125000  |
| 6 | 2.538968000  | -1.958994000 | 0.000482000  |
| 6 | 3.283645000  | -0.773821000 | -0.000499000 |
| 6 | 2.646690000  | 0.472352000  | -0.000710000 |
| 6 | -0.891868000 | 1.146494000  | 0.000676000  |
| 6 | -0.908156000 | -0.278344000 | 0.000459000  |
| 1 | 0.581370000  | -2.865245000 | 0.002810000  |
| 1 | 3.054671000  | -2.915290000 | 0.001023000  |
| 1 | 4.368950000  | -0.817612000 | -0.000856000 |
| 1 | 3.222722000  | 1.393086000  | -0.001151000 |
| 7 | 0.393365000  | 1.598560000  | 0.000008000  |
| 6 | 0.788084000  | 2.993341000  | -0.000425000 |
| 1 | 1.380562000  | 3.227706000  | 0.891041000  |
| 1 | 1.379360000  | 3.227493000  | -0.892746000 |
| 1 | -0.118444000 | 3.600450000  | 0.000105000  |
| 8 | -1.942094000 | 1.895302000  | 0.000890000  |
| 6 | -2.176931000 | -0.886180000 | -0.000736000 |
| 8 | -3.222147000 | -0.137949000 | -0.000172000 |
| 1 | -2.759977000 | 1.049645000  | 0.000823000  |

|   |              |              |              |
|---|--------------|--------------|--------------|
| 6 | -2.374153000 | -2.377914000 | -0.001360000 |
| 1 | -1.879863000 | -2.832142000 | -0.868322000 |
| 1 | -1.931024000 | -2.824084000 | 0.897226000  |
| 1 | -3.441072000 | -2.608260000 | -0.029758000 |
